# Supplementary material for: Neither State or Trait Anxiety Alter the Response to Distracting Emotionally Neutral Sounds
Source: Atypon-hosted journal article supplement (doi:10.1027/1618-3169/a000268), 2014-08-14
Supplement: zea_62_1_3_esm1.pdf [file zea_62_1_3_esm1.pdf]

## Electronic Supplementary Material

| Word | Type (Freq)                                    | Homophone (Freq) | Total Freq |
|------|------------------------------------------------|------------------|------------|
| So   | Qualifier (932) Adverb (574) Conjunction (479) | Sew (6)          | 1991       |
| Do   | Verb (1350)                                    |                  | 1350       |
| My   | Pronoun (1366)                                 |                  | 1366       |
| We   | Pronoun (2654)                                 | Wee (3)          | 2657       |

Supplementary Table 1: Word types and frequency of words used as oddball stimuli during the task (word frequencies taken from Francis et al., 1982).

| Aversive Audio-Visual stimuli |          |         |         |                                             |       | Neutral Audio-Visual stimuli |               |          |         |         |                                             |       |           |
|-------------------------------|----------|---------|---------|---------------------------------------------|-------|------------------------------|---------------|----------|---------|---------|---------------------------------------------|-------|-----------|
| Image_Desc                    | IAPS_Nbr | Valence | Arousal | Speech                                      | Words | Syllables                    | Image_Desc    | IAPS_Nbr | Valence | Arousal | Speech                                      | Words | Syllables |
| Mutilation                    | 3071     | 1.88    | 6.86    | Throat wounds sever crucial arteries        | 5     | 9                            | Satellite     | 5471     | 5.21    | 3.26    | Satellites are used for communication       | 5     | 11        |
| Mutilation                    | 3051     | 2.3     | 5.62    | People are sometimes attacked for no reason | 7     | 11                           | Outlet        | 6150     | 5.08    | 3.22    | Electrical sockets are commonplace          | 4     | 10        |
| DeadBody                      | 3120     | 1.56    | 6.84    | Some people have died during surgery        | 6     | 10                           | RollingPin    | 7000     | 5       | 2.42    | Rolling pins are used to flatten dough      | 8     | 9         |
| Mutilation                    | 3225     | 1.82    | 5.95    | Disfigurement is usually permanent          | 5     | 11                           | Bowl          | 7006     | 4.88    | 2.33    | People have breakfast in the mornings       | 6     | 9         |
| Mutilation                    | 3000     | 1.59    | 7.34    | Physical attacks often target the face      | 6     | 11                           | Mug           | 7009     | 4.93    | 3.01    | mugs are used to hold beverages             | 6     | 8         |
| Mutilation                    | 3010     | 1.71    | 7.18    | Gun shot wounds are often fatal             | 6     | 8                            | Iron          | 7030     | 4.69    | 2.99    | some clothes require ironing                | 4     | 6         |
| Dirty                         | 9300     | 2.26    | 6       | Untreated Faeces can harbour disease        | 5     | 10                           | Shoes         | 7038     | 4.82    | 3.01    | Walking boots are heavier than shoes        | 7     | 9         |
| Toilet                        | 9301     | 2.26    | 5.28    | Diahorrea is extremely unpleasant           | 4     | 11                           | HairDryer     | 7050     | 4.93    | 2.75    | hairdryers can be noisy                     | 4     | 7         |
| SlicedHand                    | 9405     | 1.83    | 6.08    | open wounds can become infected             | 5     | 9                            | Candlestick   | 7053     | 5.22    | 2.95    | Glass objects are usually breakable         | 5     | 10        |
| Cat                           | 9571     | 1.96    | 5.64    | Many pets are killed on the road            | 7     | 8                            | Lightbulb     | 7055     | 4.9     | 3.02    | There are different types of lightbulb      | 6     | 9         |
| Tumor                         | 3261     | 1.82    | 5.75    | Cancerous tumours can be deadly             | 5     | 9                            | Fork          | 7080     | 5.27    | 2.32    | Cutlery is used to eat food                 | 6     | 8         |
| Mutilation                    | 3064     | 1.45    | 6.41    | Millions have died in civil wars            | 6     | 9                            | Truck         | 7130     | 4.77    | 3.35    | Lorries are used to transport cargo         | 6     | 10        |
| Mutilation                    | 3150     | 2.26    | 6.55    | Fingers are often lost in accidents         | 6     | 10                           | Lamp          | 7175     | 4.87    | 1.72    | Most lamps are powered by electricity       | 6     | 11        |
| Mutilation                    | 3069     | 1.7     | 7.03    | The skull is fragile to trauma              | 6     | 8                            | Bed           | 7710     | 5.42    | 3.44    | Pillows support the head during sleep       | 6     | 9         |
| Accident                      | 3015     | 1.52    | 5.9     | Many have died in Traffic accidents         | 6     | 10                           | Plate         | 7233     | 5.09    | 2.77    | Plates are often decorated with patterns    | 6     | 11        |
| Mutilation                    | 3080     | 1.48    | 7.22    | Often injured people cannot be saved        | 6     | 10                           | Bridge        | 7547     | 5.21    | 3.18    | Bridges can be used to cross rivers         | 7     | 9         |
| Injury                        | 3550     | 2.54    | 5.92    | Blood loss can cause people to panic        | 7     | 9                            | Book          | 7090     | 5.19    | 2.61    | Books can have hard or soft covers          | 6     | 8         |
| EyeDisease                    | 3160     | 2.63    | 5.35    | Eyes can easily become infected             | 5     | 10                           | Window        | 7490     | 5.52    | 2.42    | Exterior walls can be painted               | 5     | 9         |
| DeadCows                      | 9181     | 2.26    | 5.39    | many animals starve to death                | 5     | 8                            | Flowers       | 5731     | 5.39    | 2.74    | Gardening is a common pasttime              | 5     | 9         |
| CryingBoy                     | 2900     | 2.45    | 5.09    | children find funerals traumatic            | 4     | 9                            | Rug           | 7179     | 5.06    | 2.88    | Carpets are often made from nylon           | 6     | 9         |
| DisabledChild                 | 3300     | 2.74    | 4.55    | Some children are born with disabilities    | 6     | 11                           | Shipyard      | 7036     | 4.88    | 3.32    | Goods are regularly transported by ship     | 6     | 11        |
| Attack                        | 6370     | 2.7     | 6.44    | Violent Criminals often mask their faces    | 6     | 11                           | Towel         | 7002     | 4.97    | 3.16    | Towels are designed to be absorbant         | 6     | 10        |
| StickThruLip                  | 9042     | 3.15    | 5.78    | Large incisions to the lip are painful      | 7     | 10                           | Chess         | 2840     | 4.91    | 2.43    | A chess board has sixty four squares        | 7     | 8         |
| Mutilation                    | 3168     | 1.56    | 6       | The face is vulnerable to disfigurement     | 6     | 12                           | Mushroom      | 5520     | 5.33    | 2.95    | Mushrooms are a type of fungus.             | 6     | 8         |
| Mutilation                    | 3016     | 1.9     | 5.82    | Violent attacks can occur during the day    | 7     | 11                           | Rain          | 9210     | 4.53    | 3.08    | Frequent rain is vital for life on earth    | 8     | 10        |
| Toenail                       | N/A      | N/A     | N/A     | Toenails can separate from the skin         | 6     | 9                            | Spoon         | 7004     | 5.04    | 2       | Spoons are used for the consumption of food | 7     | 10        |
| Puss                          | N/A      | N/A     | N/A     | Pus is the result of infection              | 7     | 9                            | Chair         | 7235     | 4.96    | 2.83    | A Chair normally has four legs              | 6     | 8         |
| Toe Stitches                  | N/A      | N/A     | N/A     | Blood often clots around stitches           | 5     | 7                            | Factoryworker | 2393     | 4.87    | 2.93    | Many people are employed in factories       | 6     | 11        |
| Sliced Foot                   | N/A      | N/A     | N/A     | Cuts to the sole are difficult to repair    | 8     | 11                           | Tourist       | 2850     | 5.22    | 3       | Many economies rely on tourism.             | 6     | 12        |
| Skull wound                   | N/A      | N/A     | N/A     | The skull can easily be penetrated          | 6     | 9                            | Plant         | 5740     | 5.21    | 2.59    | Plants grow in a variety of locations       | 7     | 12        |

Supplementary Table 2: Details of images and speech stimuli used for the audio-visual stimulus within the study. The speech stimuli did not differ in terms of duration, words or syllables between the two conditions. Valence and Arousal ratings for IAPS images come from Lang et al. (2008)

## SCR Data Collection and Analysis

The SCR equipment was built by the Medical Physics Department, University of Sheffield, based on configuration detailed in Shastri et al. (2001). Responses were collected using Ag / AgCl electrodes (8mm diameter) attached to the medial phalange of the index and middle fingers of the participant's non-response hand. The resulting data (sampled at 20Hz) was analysed using Ledalab V3.4.1 ([www.ledalab.de](http://www.ledalab.de)). The raw SCR data were first smoothed via convolution with a Hann window. The data was subsequently fitted to a bi-exponential Bateman function and optimised using a conjugated

gradient descent algorithm. This pre-processed SCR data was decomposed into its phasic and tonic components using continuous decomposition analysis (Benedek & Kaernbach, 2010). Two indices of SCR were retrieved from this analysis; an area measure of the phasic SCR response, and a count of the number of individual skin conductance responses (SCRs). Individual responses were identified as those with an amplitude of at least  $0.05\mu\text{S}$ , a threshold which is commonly used when analysing SCR data (e.g., Alexander et al., 2005).

Phasic and count (nbr of SCRs) measures were calculated the entire duration of each block (105s) excluding the periods at the end of each block during which the recognition tests and the rating scale were administered. This time frame was used because what was of interest was not the response to the individual images per se, but the arousal levels throughout the entire period in which the task was being performed.

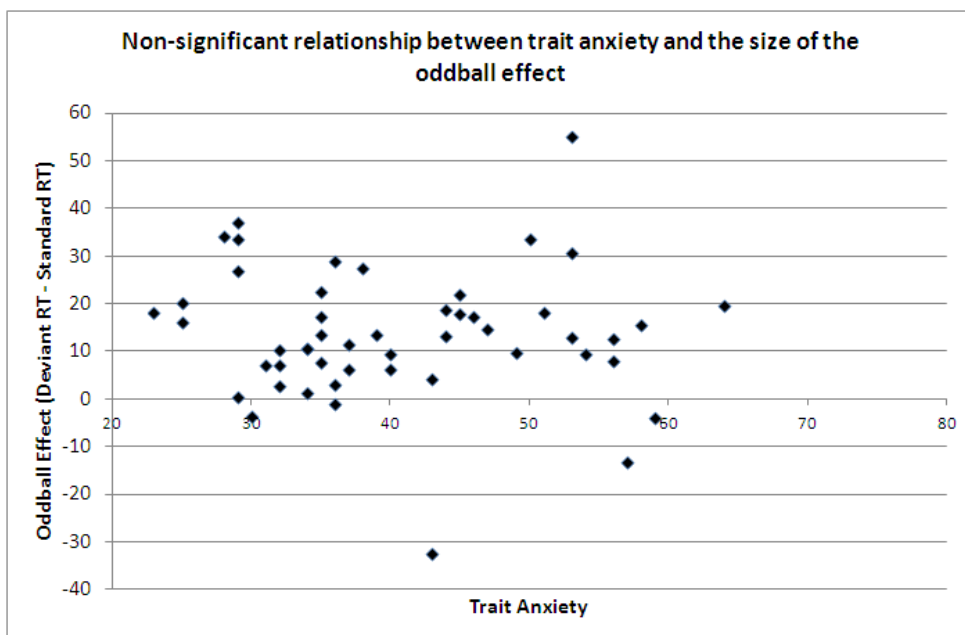

Supplementary Figure 1: Scatter graph showing the non-significant relationship between the Trait Anxiety of the participant and the size of the oddball effect (reaction time to deviant trials – reaction time to standard trials).

## References

- Alexander, D. M., Trengove, C., Johnston, P., Cooper, T., August, J. P., & Gordon, E. (2005). Separating individual skin conductance responses in a short interstimulus-interval paradigm. *Journal of Neuroscience Methods, 146*(1), 116-123. DOI 10.1016/j.jneumeth.2005.02.001
- Benedek, M., & Kaernbach, C. (2010). A continuous measure of phasic electrodermal activity. *Journal of Neuroscience Methods, 190*(1), 80-91. DOI 10.1016/j.jneumeth.2010.04.028
- Francis, W. N., Kucera, H., & Mackie, A. W. (1982). *Frequency analysis of English usage: Lexicon and grammar*. Boston, MD: Houghton Mifflin.
- Lang, P. J., Bradley, M. M., & Cuthbert, B. B. (2008). *International affective picture system (IAPS): Affective ratings of pictures and instruction manual*. Technical Report A-8.: University of Florida, Gainesville, FL.
- Shastri, A., Lomarev, M. P., Nelson, S. J., George, M. S., Holzwarth, M. R., & Bohning, D. E. (2001). A low-cost system for monitoring skin conductance during functional MRI. *Journal of Magnetic Resonance Imaging, 14*(2), 187-193. Doi 10.1002/Jmri.1171
